# Supplementary material for: Surface-enhanced Raman spectroscopy (SERS) for detection of VX and HD in the gas phase using a hand-held Raman spectrometer
Source: Royal Society of Chemistry journal article supplement (doi:10.1039/d0an01170c), 2020-01-01
Supplement: d0an01170c1.pdf [file d0an01170c1.pdf]

## Surface-enhanced Raman Spectroscopy (SERS) for the detection of VX and HD in gas phase using a hand-held Raman spectrometer

Vered Heleg-Shabtai\*<sup>a</sup>, Hagai Sharabi<sup>a</sup>, Amalia Zaltsman<sup>a</sup>, Izhar Ron<sup>a</sup> and Alexander Pevzner\*<sup>a</sup>

<sup>a</sup> Department of Physical Chemistry, Israel Institute for Biological Research, P.O. Box 19, Ness-Ziona 74100 Israel

### Supplementary Information:

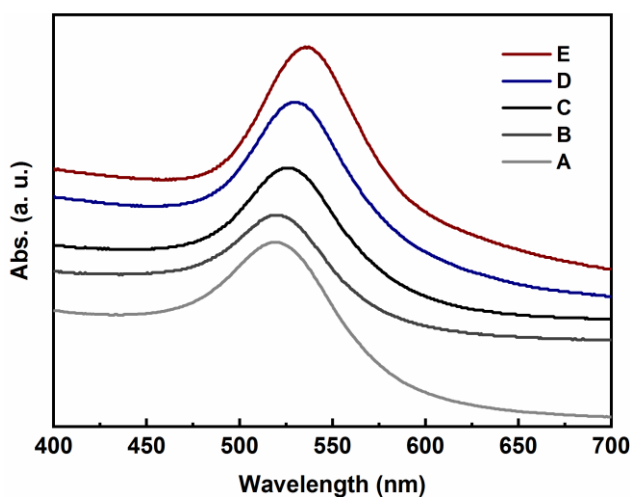

Fig. S1: UV-Vis spectra of Au colloidal suspensions B-E grown by iterative  $\text{NH}_2\text{OH}$  seeding of  $\sim 12$  nm diameter Au colloidal suspension (A).

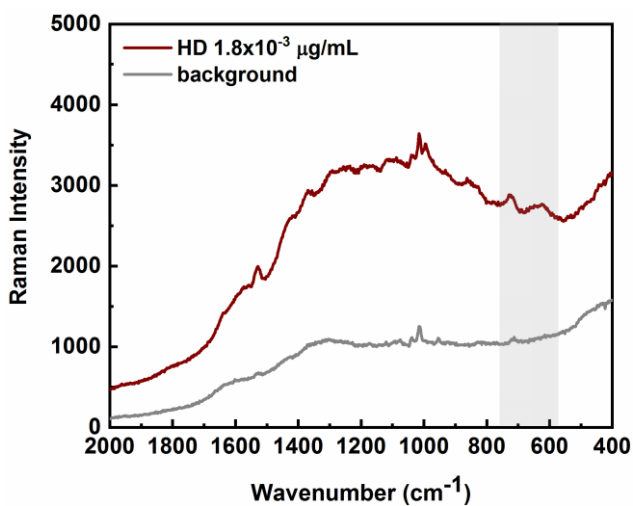

Fig. S2: SERS spectra of HD at LOD concentration and background in Au colloidal suspensions, accumulation time 10 s.

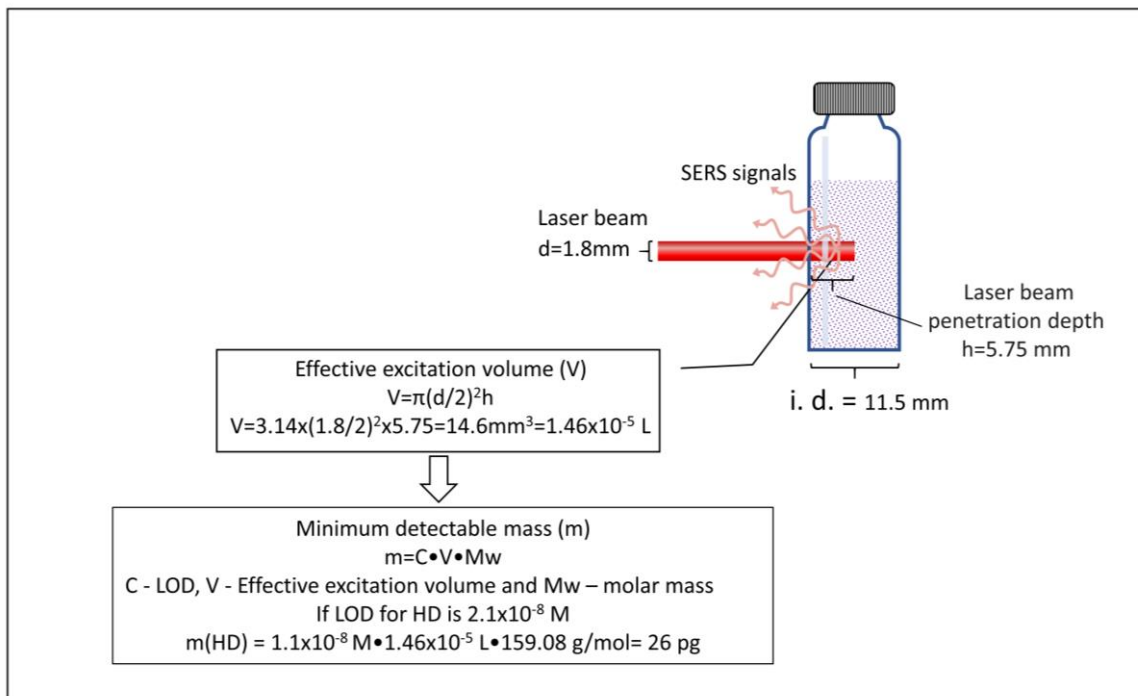

Fig. S3: Estimation of minimum detectable mass.

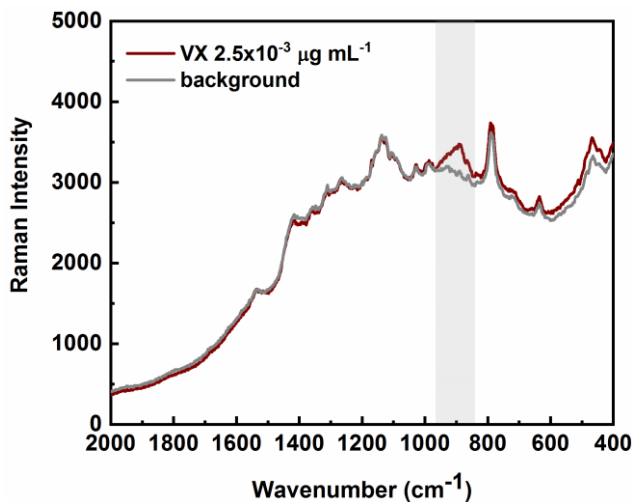

Fig. S4: SERS spectra of VX at LOD concentration and background in Au colloidal suspensions, accumulation time 1 s.
